# Supplementary material
Source: PubMed Central journal article supplement (PMC4506204)

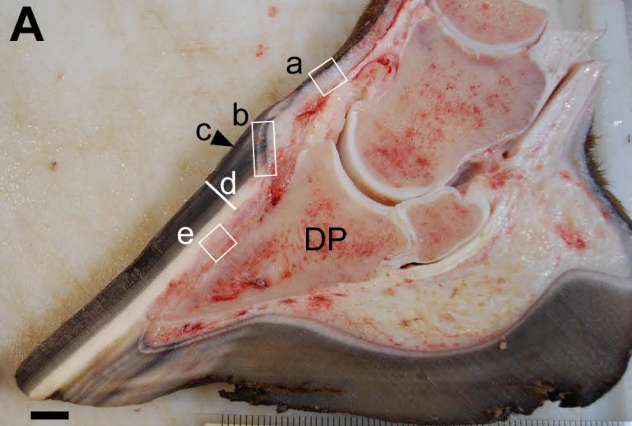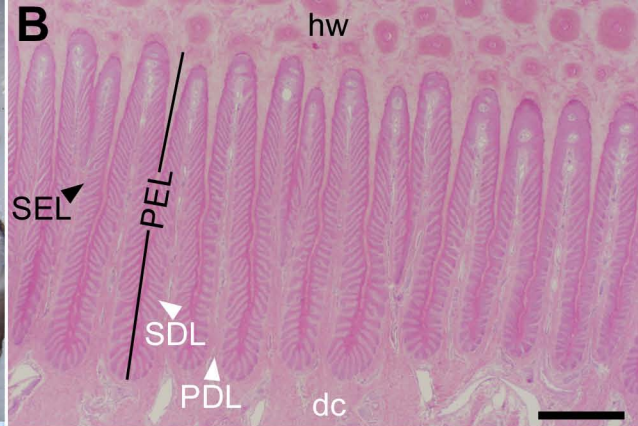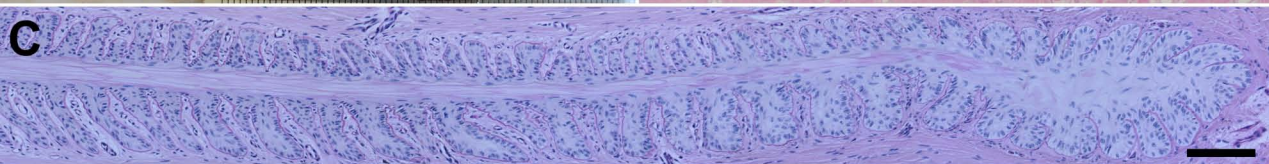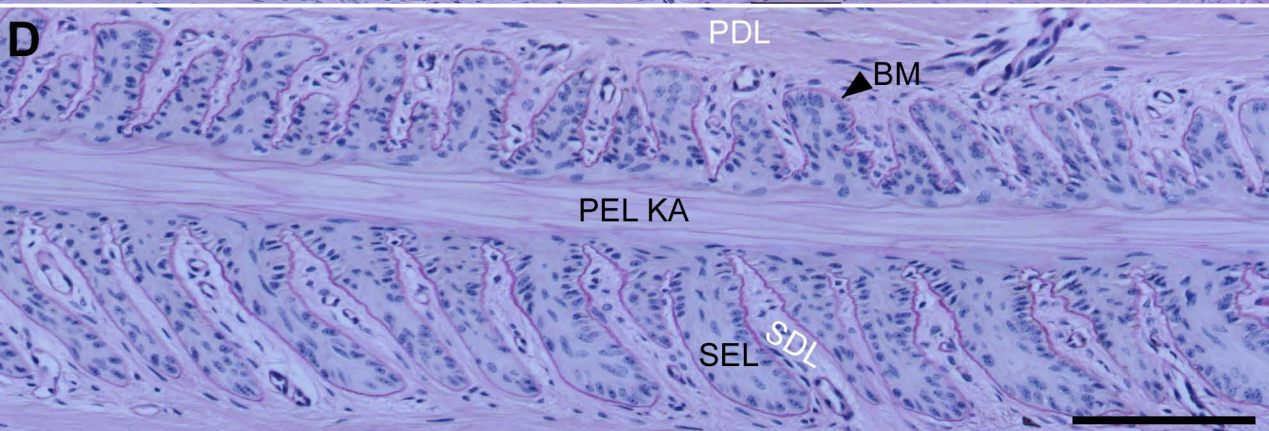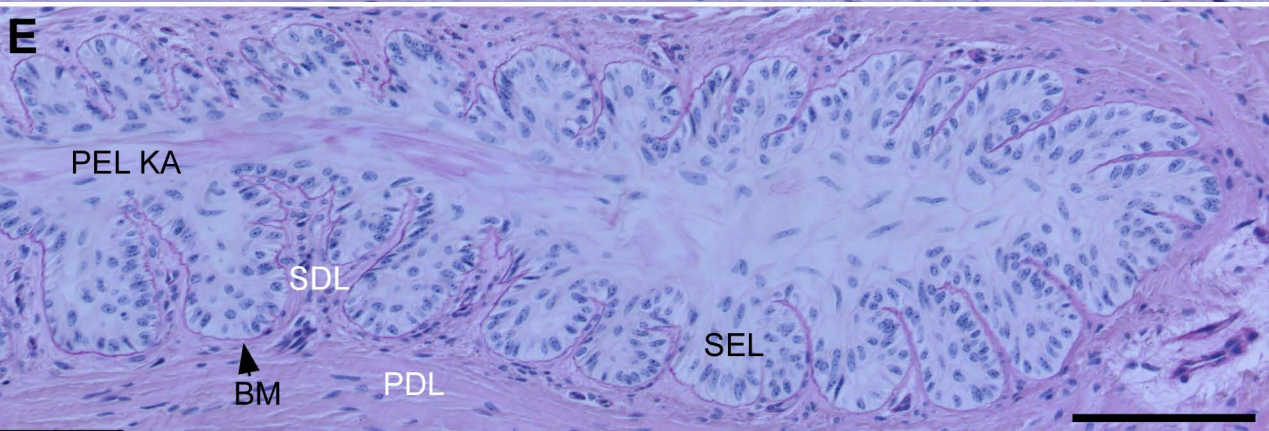



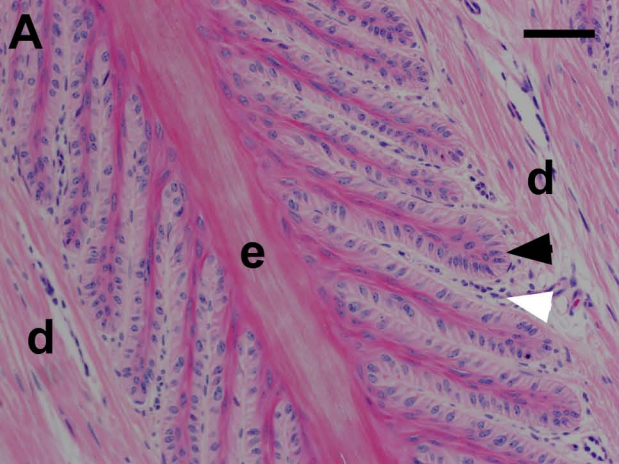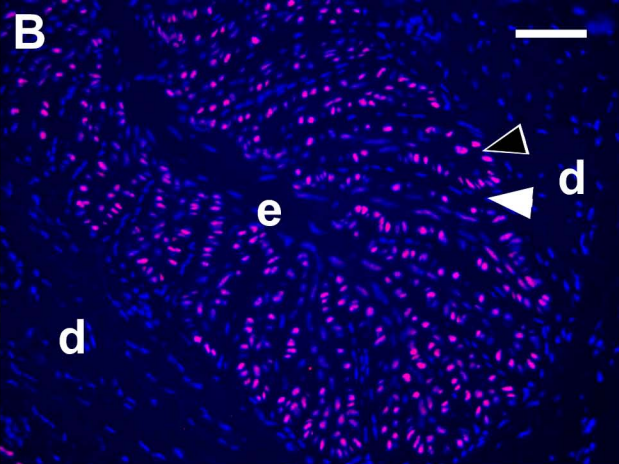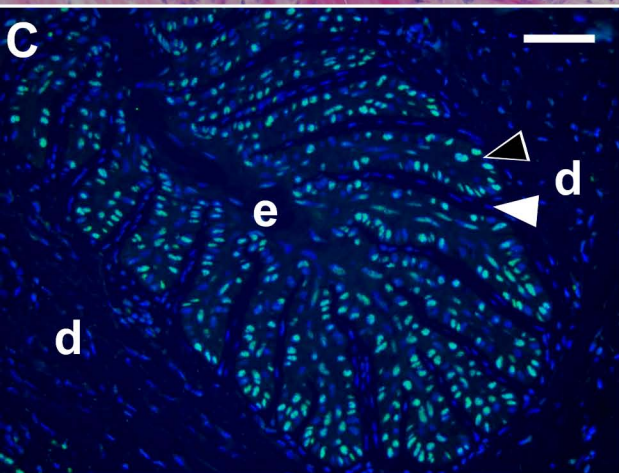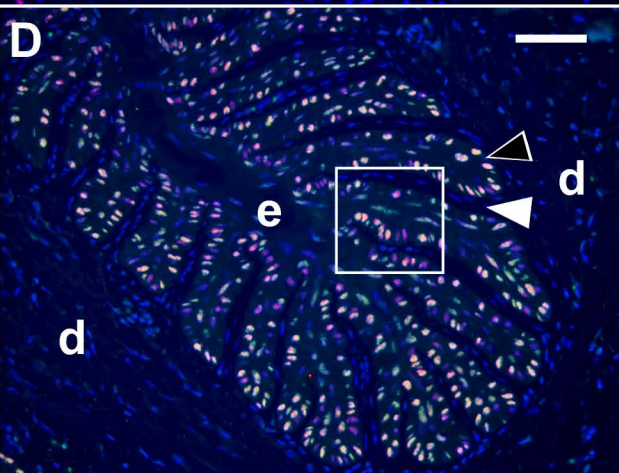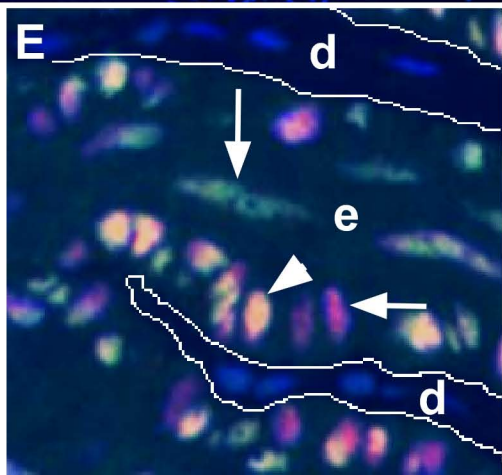

Supplement: NIHMS672048-supplement-Supp_FigureS1-S2.pdf [file NIHMS672048-supplement-Supp_FigureS1-S2.pdf]
